# Supplementary material
Source: PubMed Central journal article supplement (PMC6007119)
Supplement: AEM.00438-18_zam013188575s1.pdf [file AEM.00438-18_zam013188575s1.pdf]

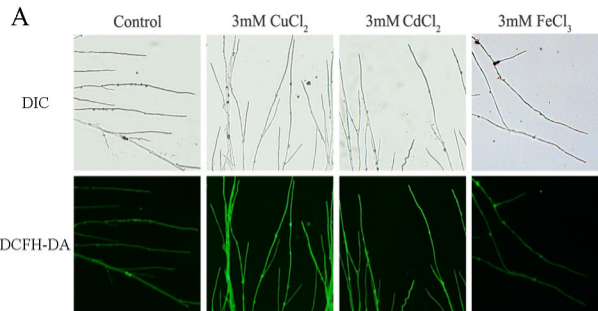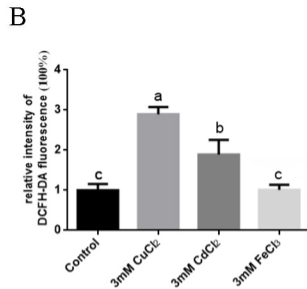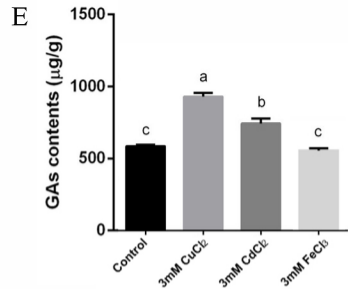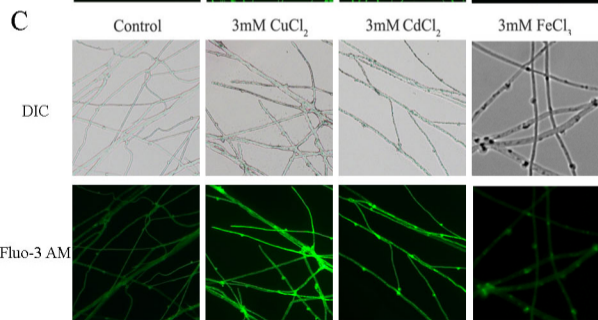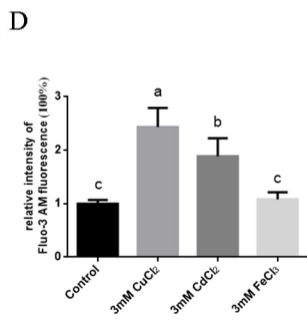

**A**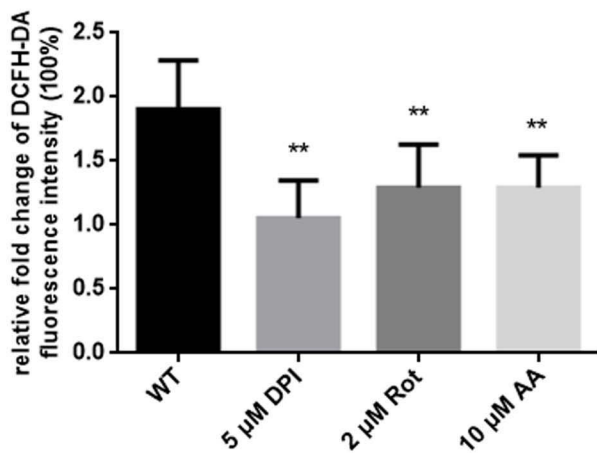**B**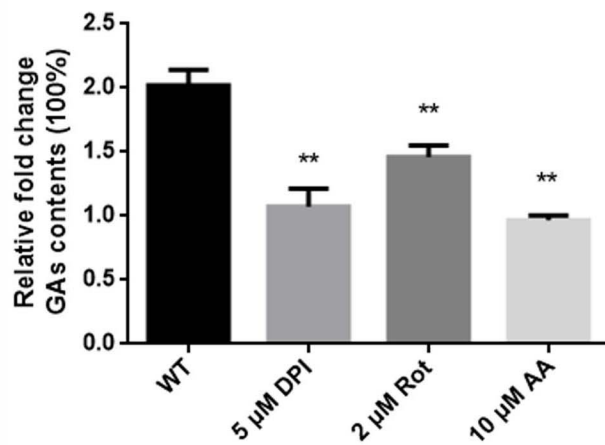**C**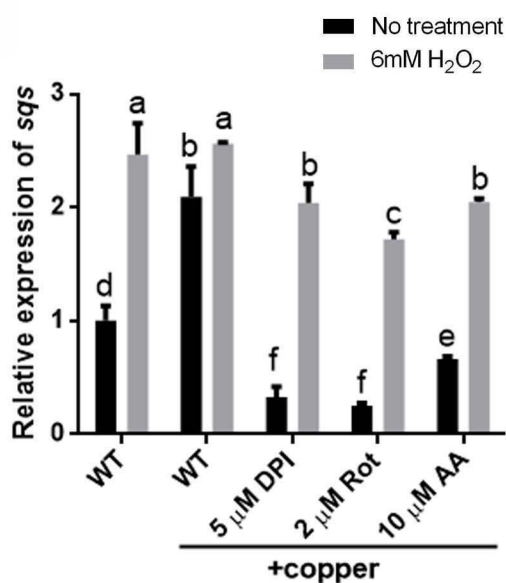**D**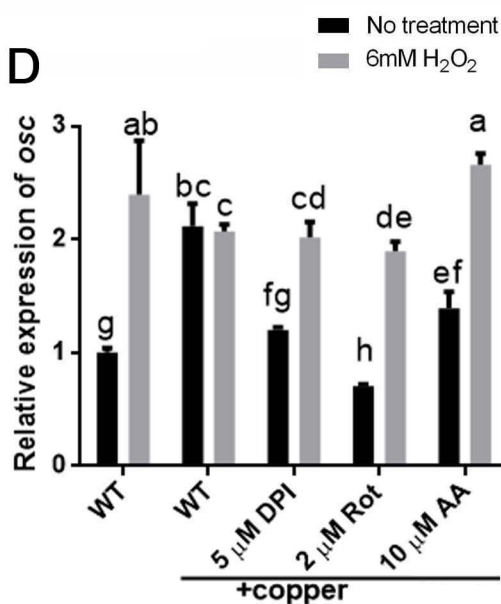**E**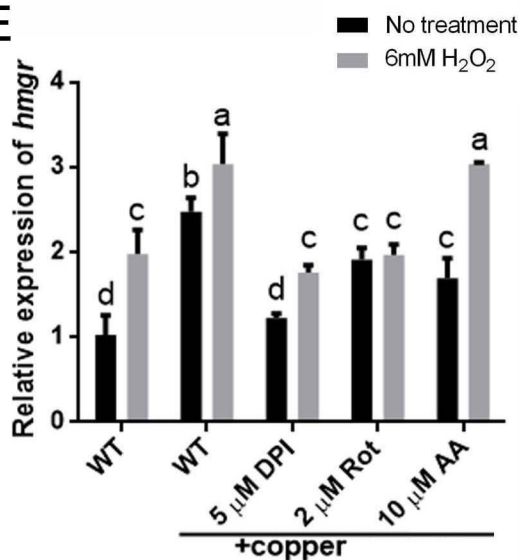**F**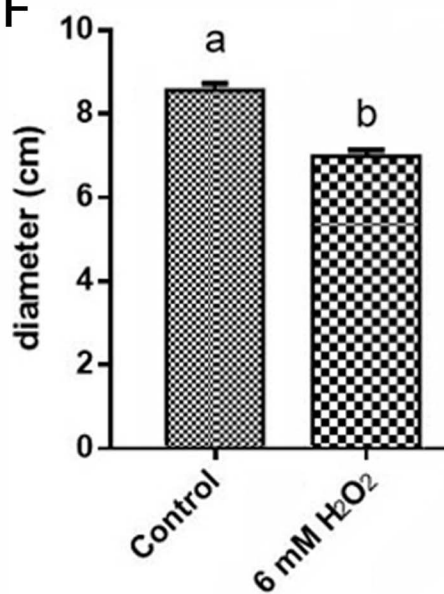

**A**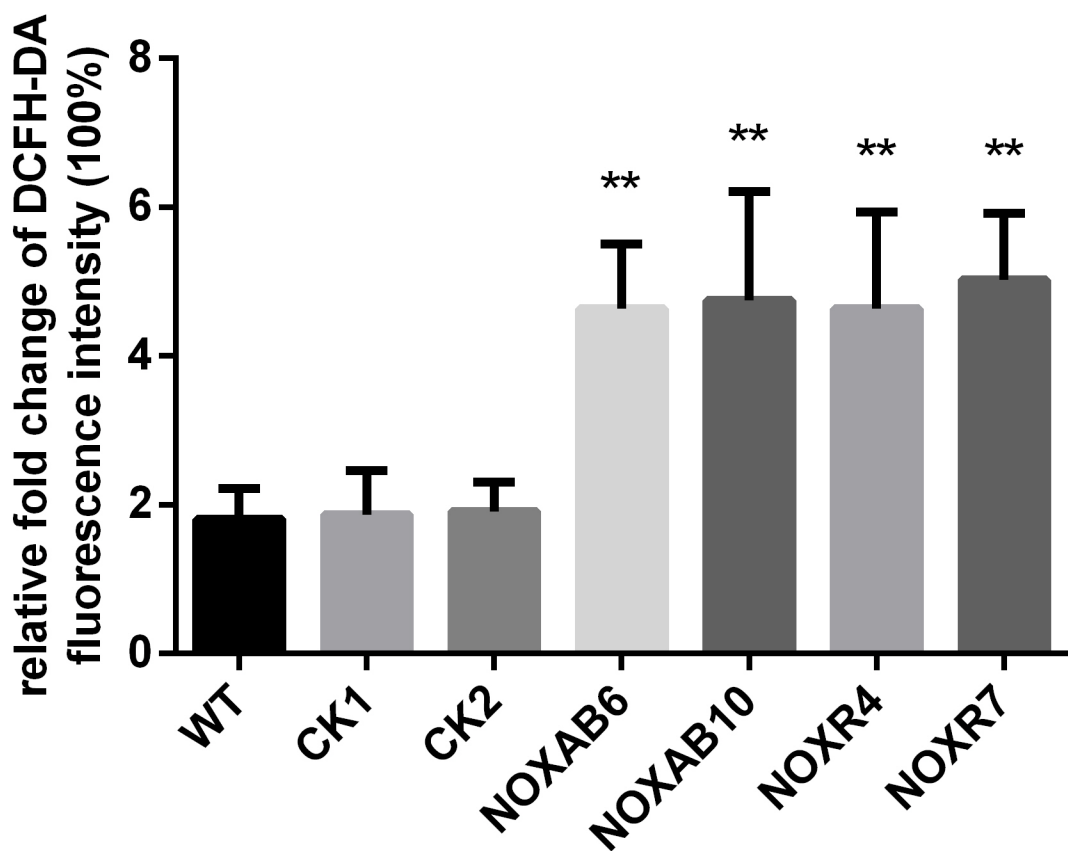**B**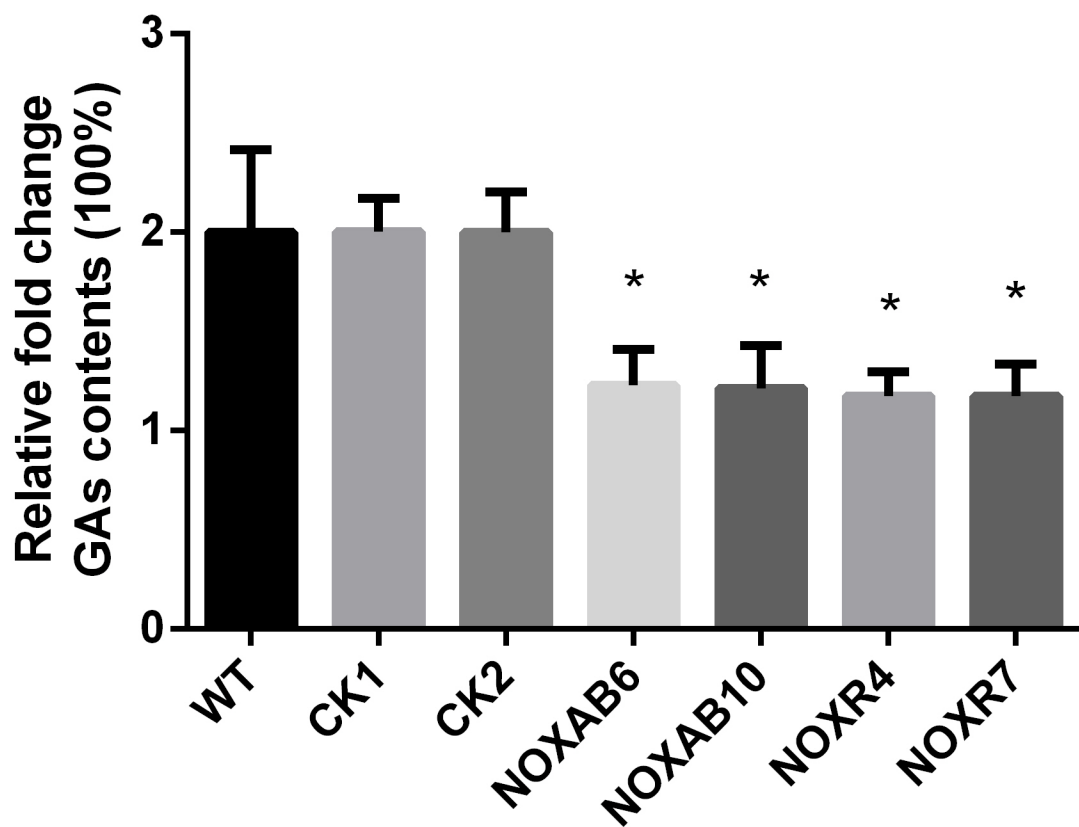

**A**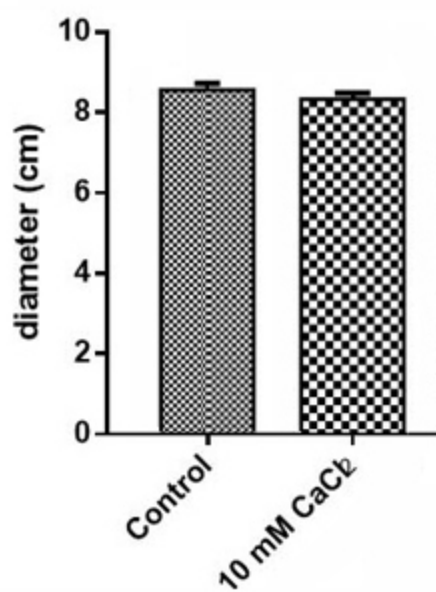**B**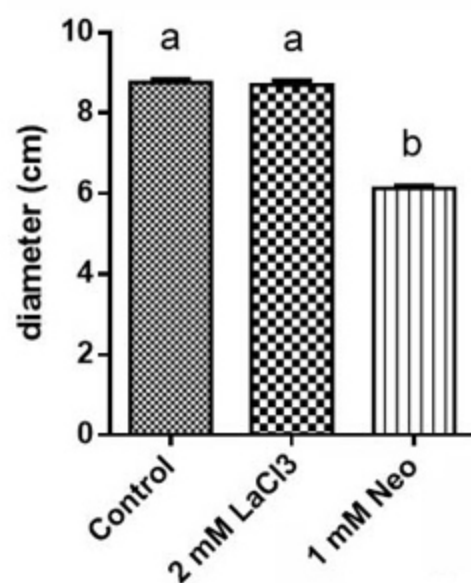**C**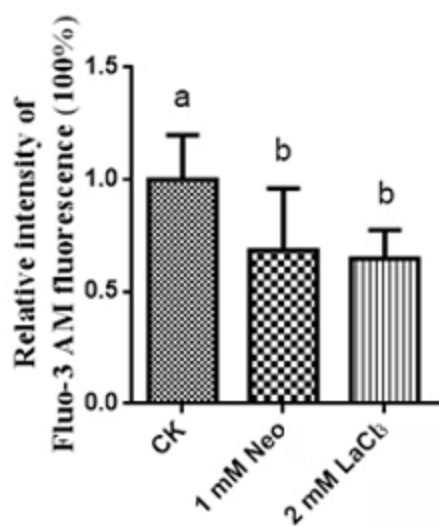**D**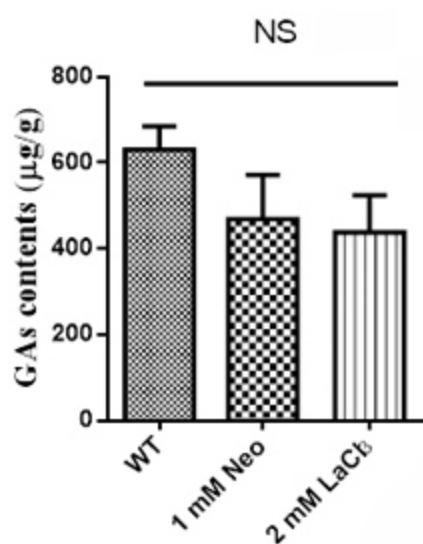**E**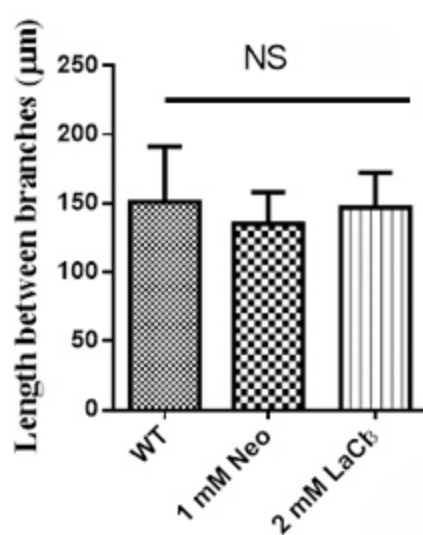**F**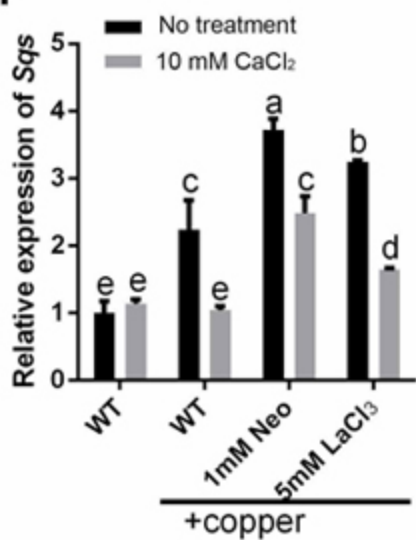**G**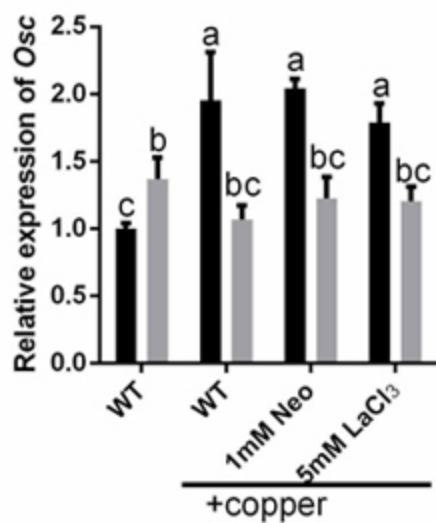**H**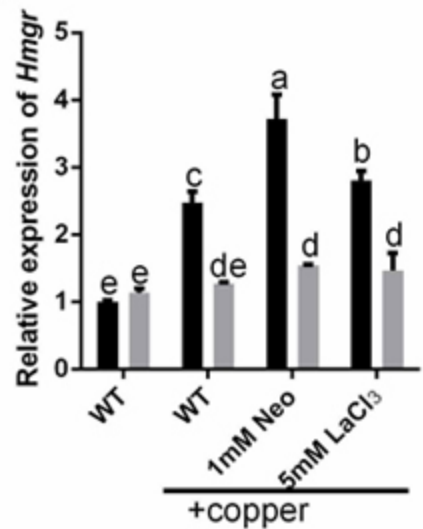

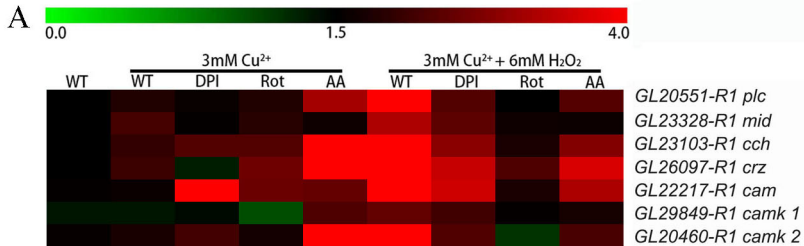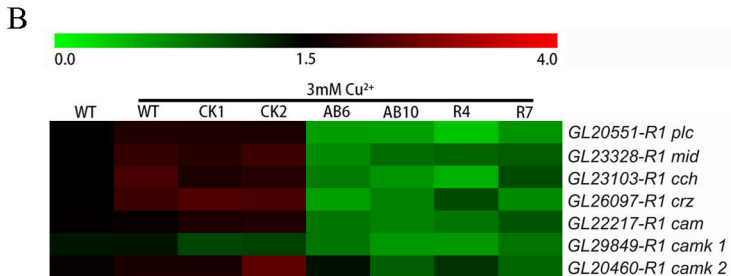

**A**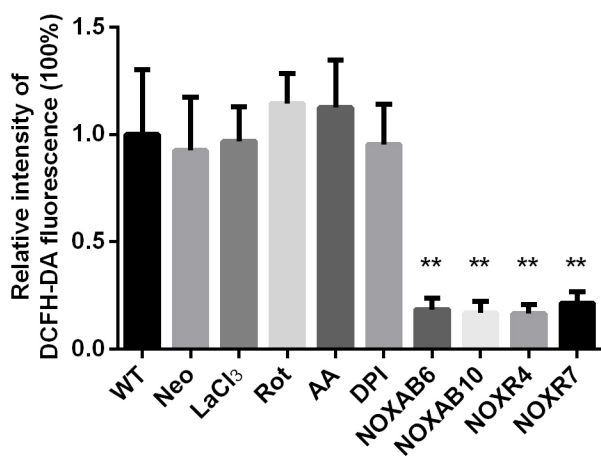**B**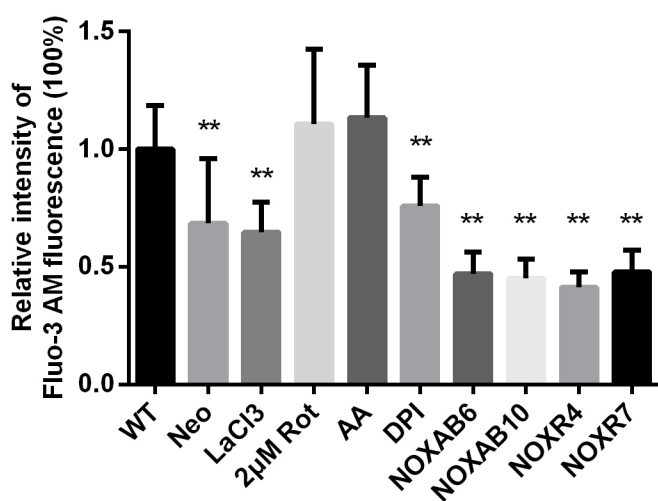**C**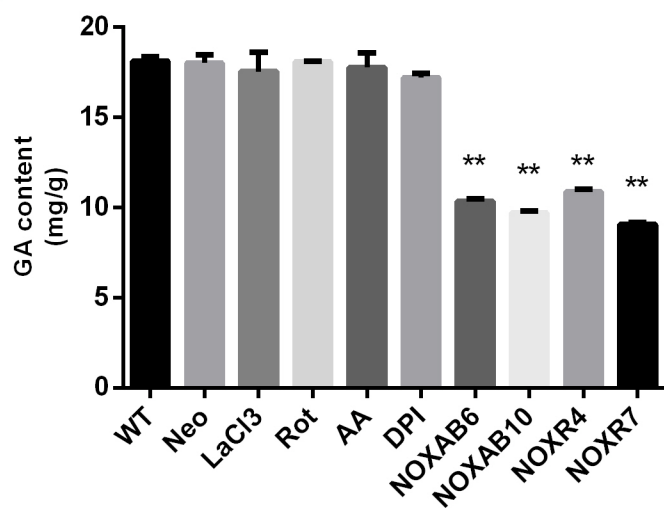**D**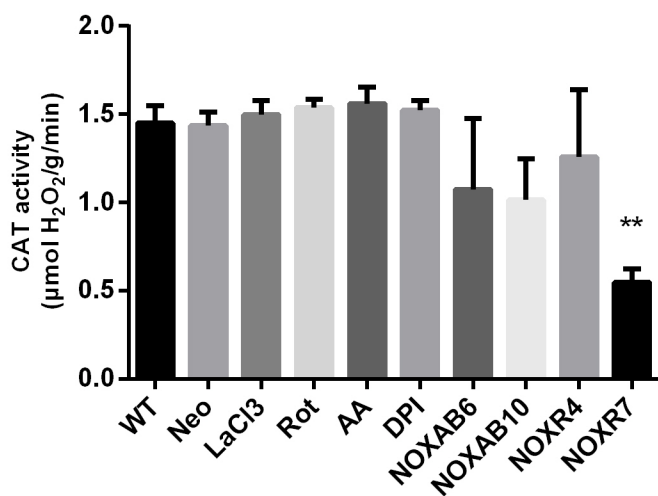**E**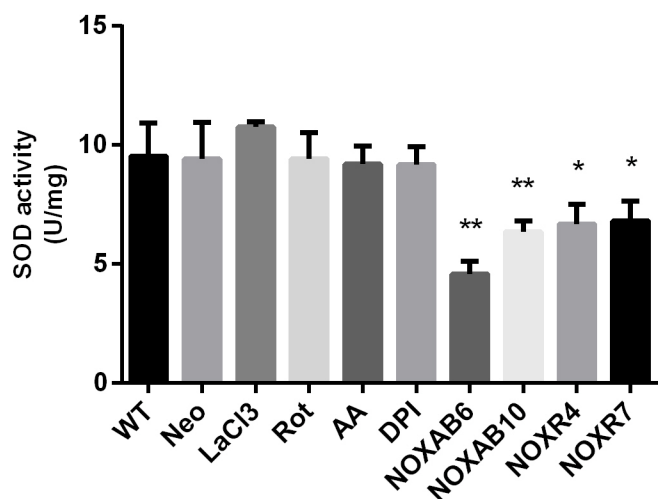**F**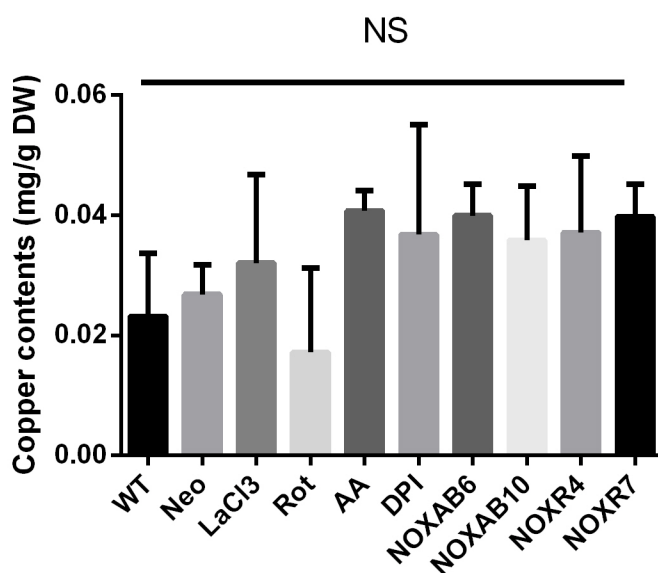

1 **Supplemental Figures Legends**

2 **FIG. S1 Effect of Cd<sup>2+</sup> and Fe<sup>3+</sup> on the GAs, ROS and Ca<sup>2+</sup> contents in *G. lucidum***

3 *G. lucidum* wild-type strain was cultured on CYM plates for 5 days with different concentrations of  
4 copper. Aerial hyphae were removed from actively growing colonies, suspended in fluorescent dye  
5 DCFH-DA for cytosolic ROS detection (A) or Fluo-3AM (B) for the free cytosolic Ca<sup>2+</sup> detection for 30  
6 min at 37 °C. The hyphae were washed three times with PBS to remove excess fluorophore. The green  
7 fluorescence DCF- and Fluo 3-labeled cells were visualized by CLSM, with the green fluorescence  
8 intensity representing the levels of cytosolic ROS and Ca<sup>2+</sup>. DIC denotes differential interference contrast.  
9 Scale bar = 100 μm. C and D. Changes in the cytosolic ROS and Ca<sup>2+</sup> fluorescence ratio in copper-  
10 stressed *G. lucidum*. The Y-axis is the fluorescence ratio measured by CLSM, and the X-axis represents  
11 the different concentrations of copper. E. The wild-type strain was cultured in CYM liquid with shaking  
12 at 28 °C. On the 4th day, 3 mM Cu<sup>2+</sup>, 3 mM Cd<sup>2+</sup>, and 3 mM Fe<sup>3+</sup> were added. On the 7th day, the sample  
13 were analyzed. Within each set of experiments, different letters indicate significant differences between  
14 the lines (P < 0.05, according to one-way ANOVA multiple comparison test).

15 **FIG. S2 The effect of ROS-related reagents on fold change of ROS contents and GAs contents,**  
16 **expression of GAs-related genes in *G. lucidum* under copper stress**

17 A, B. The effect of DPI, Rot, and AA on fold change of ROS and GAs contents induced by copper treated.  
18 C-E. The relative expression of genes encoding key enzymes in the GAs biosynthetic pathway was  
19 measured in *G. lucidum* mycelia with ROS-related inhibitor, H<sub>2</sub>O<sub>2</sub> and 3 mM copper treatment. The Y  
20 axis is the relative expression of *Sqs* (C), *Osc* (D) and *Hmgr* (E) measured by RT-PCR, and the X axis is  
21 the different treatments. F. The effect of H<sub>2</sub>O<sub>2</sub> on hyphal growth without copper treated. All values are  
22 the mean ± SD of three independent experiments. Within each set of experiments, different letters

23 indicate significant differences between the lines ( $P < 0.05$ , according to one-way ANOVA multiple  
24 comparison test).

25 **FIG. S3 The effect of NOX silencing on fold change of ROS contents and GAs contents, expression**  
26 **of GAs-related genes in *G. lucidum* under copper stress**

27 A, B. The effect of NOX silencing on fold change of ROS and GAs contents induced by copper treated.

28 All values are the mean  $\pm$  SD of three independent experiments. Within each set of experiments, different  
29 letters indicate significant differences between the lines ( $P < 0.05$ , according to one-way ANOVA  
30 multiple comparison test).

31 **FIG. S4 The effect of  $\text{Ca}^{2+}$ -related reagents on hyphal growth,  $\text{Ca}^{2+}$  contents, GAs contents and**  
32 **expression of GAs-related genes in *G. lucidum* under copper stress**

33 A, B. The effect of  $\text{CaCl}_2$ ,  $\text{LaCl}_3$ , and Neo on hyphal growth without copper treated. C-D. The effect of

34  $\text{LaCl}_3$ , and Neo on fold change of  $\text{Ca}^{2+}$  and GAs contents induced by copper treated. E. The effect of

35  $\text{LaCl}_3$ , and Neo on hyphal branching without copper treated. F-H. The relative expression of genes

36 encoding key enzymes in the GAs biosynthetic pathway was measured in *G. lucidum* mycelia with  $\text{Ca}^{2+}$ -

37 related inhibitor,  $\text{CaCl}_2$  and 3 mM copper treatment. The Y axis is the relative expression of *Sqs* (F), *Osc*

38 (*G*) and *Hmgr* (H) measured by RT-PCR, and the X axis is the different treatments. All values are the

39 mean  $\pm$  SD of three independent experiments. Within each set of experiments, different letters indicate

40 significant differences between the lines ( $P < 0.05$ , according to one-way ANOVA multiple comparison

41 test).

42 **FIG. S5 The effect of reagents on genes expression in *G. lucidum* under copper stress**

43 The expression levels of certain ROS and  $\text{Ca}^{2+}$  signaling-related genes were measured after the hyphae

44 were treated with different treatments (A. 3 mM copper and 6 mM  $\text{H}_2\text{O}_2$  treatment with ROS related



45 reagents; B. 3mM treatment on Nox-silenced strains). Relevant genes were detected using real-time PCR,  
46 reference gene was used as *actin* gene, and the results are presented as a heatmap generated using  
47 GENESPRINGGX 7.3.1 software (Agilent Technologies). Relative expression is shown as a mean value  
48 from 0.0 to 4.0 in green to red.

49 **FIG. S6 The effect on ROS, Ca<sup>2+</sup>, and GAs contents, antioxidant activities, and copper contents in**  
50 ***G. lucidum* under different agents without copper treated**

51 A. Measurement of ROS contents by DCFH-DA staining to detect the effect of different agents and NOX-  
52 silencing without copper treated on ROS contents. B Measurement of Ca<sup>2+</sup> contents by Fluo-3 AM  
53 staining to detect the effect of different agents and NOX-silencing without copper treated on Ca<sup>2+</sup>  
54 contents. C. Measurement of GAs contents to detect the effect of different agents and NOX-silencing  
55 without copper treated on GAs contents. D, E. Measurement of CAT and SOD activities to detect the  
56 effect of different agents and NOX-silencing without copper treated on antioxidant activities. E.  
57 Measurement of copper contents to detect the effect of different agents and NOX-silencing without  
58 copper treated. Within each set of experiments, different letters indicate significant differences between  
59 the lines (P < 0.05, according to one-way ANOVA multiple comparison test).  
60
